# Supplementary material for: Pheomelanin molecular vibration is associated with mitochondrial ROS production in melanocytes and systemic oxidative stress and damage
Source: Royal Society of Chemistry journal article supplement (doi:10.1039/c7ib00107j), 2017-07-11
Supplement: c7ib00107j2.pdf [file c7ib00107j2.pdf]

**Table S2.** Relationship between mitochondrial ROS and systemic oxidative stress and damage. The results of two PLSR models for GSH:GSSG ratio in erythrocytes and MDA levels in plasma are shown. Predictors whose regression coefficients are significant are marked in bold (\*:  $P < 0.05$ , \*\*:  $P < 0.01$ ).

| <i>Predictor</i>   | <b>GSH:GSSG</b>  |                        | <b>MDA</b>       |                        |
|--------------------|------------------|------------------------|------------------|------------------------|
|                    | Predictor weight | Regression coefficient | Predictor weight | Regression coefficient |
| DHR fluorescence   | <b>-0.34 **</b>  | <b>-0.24</b>           | <b>0.23 **</b>   | <b>0.38</b>            |
| Mitox fluorescence | <b>-0.38 **</b>  | <b>-0.31</b>           | <b>0.19 *</b>    | <b>0.37</b>            |
| SOD activity       | <b>0.38 **</b>   | <b>0.13</b>            | <b>-0.27 **</b>  | <b>-0.21</b>           |
| Catalase activity  | -0.08            | -0.02                  | 0.03             | 0.02                   |
| GSH levels         | -                | -                      | <b>-0.42 **</b>  | <b>-0.54</b>           |
| Breed              | <b>- **</b>      | <b>0.03</b>            | <b>- **</b>      | <b>-0.10</b>           |
| Sex                | -                | -0.02                  | -                | 0.05                   |
| Condition          | <b>0.26 **</b>   | <b>0.34</b>            | <b>-0.43 **</b>  | <b>-1.26</b>           |
